1 **Properties of genomic relationships for estimating current genetic**  
2 **variances within and genetic correlations between populations**

3

4 Yvonne C.J. Wientjes\*, Piter Bijma\*, J  r  mie Vandenplas\*, Mario P.L. Calus\*

5

6 \* Wageningen University & Research, Animal Breeding and Genomics, 6700 AH

7 Wageningen, The Netherlands

8

9

10

11

12

13

14

15 Running title: Genetic correlation between populations

16

17 Key words: genetic correlation between populations, genomic relationships, genetic variance,

18 multi-trait model

19

20 Author information:

21 Yvonne Wientjes

22 Wageningen University & Research

23 Animal Breeding and Genomics

24 P.O. box 338, 6700 AH Wageningen, the Netherlands

25 E-mail: [yvonne.wientjes@wur.nl](mailto:yvonne.wientjes@wur.nl)

26 Phone: +31 317 481 904

27

28

29

30  
31  
32  
33  
34  
35  
36  
37  
38  
39  
40  
41  
42  
43  
44  
45  
46  
47  
48  
49

## ABSTRACT

Different methods are available to calculate multi-population genomic relationship matrices. Since those matrices differ in base population, it is anticipated that the method used to calculate the genomic relationship matrix affect the estimate of genetic variances, covariances and correlations. The aim of this paper is to define a multi-population genomic relationship matrix to estimate current genetic variances within and genetic correlations between populations. The genomic relationship matrix containing two populations consists of four blocks, one block for population 1, one block for population 2, and two blocks for relationships between the populations. It is known, based on literature, that current genetic variances are estimated when the current population is used as base population of the relationship matrix. In this paper, we theoretically derived the properties of the genomic relationship matrix to estimate genetic correlations and validated it using simulations. When the scaling factors of the genomic relationship matrix fulfill the property  $k_{12} = \sqrt{k_1} \sqrt{k_2}$ , the genetic correlation is estimated even though estimated variance components are not necessarily related to the current population. When this property is not met, the correlation based on estimated variance components should be multiplied by  $\frac{\sqrt{k_1} \sqrt{k_2}}{k_{12}}$  to rescale the genetic correlation. In this study we present a genomic relationship matrix which directly results in current genetic variances as well as genetic correlations between populations.

50

## INTRODUCTION

51 When estimating additive genetic values of individuals, the relationships between  
52 individuals are used to describe the covariance between additive genetic values for a specific  
53 trait. Those covariances between individuals are best represented by the relationships at causal  
54 loci. Since causal loci are generally unknown, different approaches have been developed to  
55 estimate relationships from genomic marker data (e.g., VanRaden 2008; Powell *et al.* 2010;  
56 Yang *et al.* 2010). As long as causal loci and genomic markers have the same properties, such  
57 as allele frequency distribution, relationships at the markers are observed to be an unbiased  
58 estimate of relationships at the causal loci (Yang *et al.* 2010; Yang *et al.* 2015).

59 Relationships are expressed relative to a base population, consisting of unrelated  
60 individuals that have average self-relationships of one, for which the additive genetic variance  
61 is estimated. The base population of a genomic relationship matrix depends on the method  
62 used to calculate the relationship matrix, therefore estimated variances differ across methods  
63 (Speed and Balding 2015; Legarra 2016). By using the current allele frequencies to calculate  
64 the genomic relationship matrix, the current population is the base population for which  
65 additive genetic variances are estimated (Hayes *et al.* 2009).

66 Genomic relationships can also be calculated between distantly related individuals, for  
67 example between individuals from different populations. Those relationships can be used to  
68 estimate genetic correlations between populations using a multi-trait model (Karoui *et al.*  
69 2012), where the same trait in each population is modelled as a different trait. Due to  
70 differences in environments and allele frequencies, in combination with non-additive effects,  
71 the allele substitution effects of causal loci can differ between populations (e.g., Fisher 1918;  
72 Fisher 1930; Falconer 1952). Moreover, some causal loci might only segregate in one of the  
73 populations. Therefore, the genetic correlation between populations can differ from 1.

74 The genetic correlation between populations is an important parameter, since it is used to  
75 understand the genetic architecture and evolution of complex traits, such as disease traits in  
76 humans (De Candia *et al.* 2013; Brown *et al.* 2016). Moreover, the genetic correlation  
77 determines whether information can be shared across populations as done in multi-population  
78 genomic prediction (Wientjes *et al.* 2015; Wientjes *et al.* 2016), which is of importance for  
79 animals (e.g., Karoui *et al.* 2012; Olson *et al.* 2012), plants (e.g., Lehermeier *et al.* 2015) and  
80 humans (e.g., De Candia *et al.* 2013).

81 Different methods are available to calculate multi-population genomic relationship  
82 matrices (Harris and Johnson 2010; Erbe *et al.* 2012; Chen *et al.* 2013; Makgahlela *et al.*  
83 2013). The two most important differences between the methods are: 1) the assumed relation  
84 between effect size and allele frequency of markers; namely assuming effect size and allele  
85 frequency are independent (e.g., method 1 of VanRaden (2008)) or assuming that markers  
86 with a lower allele frequency have a larger effect (e.g., method 2 of VanRaden (2008) and  
87 Yang (2010)), and 2) the allele frequency that is used; namely allele frequencies specific to  
88 each population, the average allele frequency across the populations, or the estimated allele  
89 frequency when the populations separated. Since relationships between individuals differ  
90 across those methods, it is anticipated that the method used to calculate the genomic  
91 relationship matrix affects the estimate of the genetic correlation.

92 Therefore, the aim of this paper is to define a multi-population genomic relationship matrix  
93 to estimate current genetic variances within and genetic correlations between populations. We  
94 theoretically derive a relationship matrix with this property and validate it with simulations.  
95 To rule out the effect of differences in linkage disequilibrium between markers and causal  
96 loci, we will focus in the entire paper on a situation where causal loci are used to calculate the  
97 relationships.

98

## MATERIALS AND METHODS

### 99 Theory

100 The additive genetic correlation,  $r_g$ , is the correlation between additive genetic values ( $A$ )  
 101 for two traits of the same individual (Bohren *et al.* 1966; Falconer and Mackay 1996). In an  
 102 additive model and under the assumptions that the correlation originates from pleiotropy,  
 103 genetic values are independent between loci, and allele substitution effects are independent  
 104 from allele frequency,  $r_g$  is equal to the average correlation between allele substitution effects  
 105 of the two traits, denoted as trait 1 and 2, at causal loci. This equality can be shown for  
 106 individual  $i$  by considering both genotypes ( $z$ ) and allele substitution effects ( $\alpha$ ) at all  $n_c$   
 107 causal loci as random:

$$\begin{aligned}
 108 \quad \text{Var}(A_{i1}) &= \text{Var}\left(\sum_j z_{ij}\alpha_{1j}\right) = E\left(\left(\sum_j z_{ij}\alpha_{1j}\right)\left(\sum_l z_{il}\alpha_{1l}\right)\right) = \sum_j E(z_{ij}z_{ij})E(\alpha_{1j}\alpha_{1j}) \\
 &= n_c E(z_{ij}z_{ij})E(\alpha_{1j}\alpha_{1j}) \\
 109 \quad \text{Var}(A_{i2}) &= n_c E(z_{ij}z_{ij})E(\alpha_{2j}\alpha_{2j}) \\
 110 \quad \text{Cov}(A_{i1}, A_{i2}) &= \text{Cov}\left(\sum_j z_{ij}\alpha_{1j}, \sum_l z_{il}\alpha_{2l}\right) = E\left(\left(\sum_j z_{ij}\alpha_{1j}\right)\left(\sum_l z_{il}\alpha_{2l}\right)\right) = \sum_j E(z_{ij}z_{ij})E(\alpha_{1j}\alpha_{2j}) \\
 &= n_c E(z_{ij}z_{ij})E(\alpha_{1j}\alpha_{2j}) \\
 r_g &= \frac{\text{Cov}(A_{i1}, A_{i2})}{\sqrt{\text{Var}(A_{i1})} \sqrt{\text{Var}(A_{i2})}} = \frac{n_c E(z_{ij}z_{ij})E(\alpha_{1j}\alpha_{2j})}{\sqrt{n_c E(z_{ij}z_{ij}) E(\alpha_{1j}\alpha_{1j})} \sqrt{n_c E(z_{ij}z_{ij}) E(\alpha_{2j}\alpha_{2j})}} \\
 111 \quad &= \frac{E(\alpha_{1j}\alpha_{2j})}{\sqrt{E(\alpha_{1j}\alpha_{1j})} \sqrt{E(\alpha_{2j}\alpha_{2j})}} = \frac{\sigma_{\alpha_{12}}}{\sqrt{\sigma_{\alpha_1}^2} \sqrt{\sigma_{\alpha_2}^2}} = r_\alpha \quad (1)
 \end{aligned}$$

112 where  $j$  and  $l$  denote the different causal loci. Genotypes are represented by allele counts  
 113 coded as 0, 1 and 2 that are centered by subtracting  $2p$ , where  $p$  is the allele frequency for the  
 114 counted allele.

115 Similar to genetic correlations between traits in one population, the genetic correlation ( $r_g$ )  
 116 between populations can be estimated in a multi-trait model using a relationship matrix and

117 REML by modelling the phenotypes of two populations as different traits (Karoui *et al.*  
 118 2012). This approach is also known as multi-trait GREML. In the following, we will refer to  
 119 trait 1 as the trait expressed in population 1 and to trait 2 as the trait expressed in population 2.  
 120 When considering performance in different populations as different traits, individuals have a  
 121 phenotype for only one trait. Therefore, the (co)variance structure of the additive genetic  
 122 values can be written as (Visscher *et al.* 2014):

$$123 \quad \begin{bmatrix} \mathbf{a}_1 \\ \mathbf{a}_2 \end{bmatrix} \sim N \left( \begin{bmatrix} \mathbf{0} \\ \mathbf{0} \end{bmatrix}, \begin{bmatrix} \text{Var}(\mathbf{a}_1) & \text{Cov}(\mathbf{a}_1, \mathbf{a}_2) \\ \text{Cov}(\mathbf{a}_2, \mathbf{a}_1) & \text{Var}(\mathbf{a}_2) \end{bmatrix} \right) = N \left( \begin{bmatrix} \mathbf{0} \\ \mathbf{0} \end{bmatrix}, \begin{bmatrix} \mathbf{G}_{11}\sigma_1^2 & \mathbf{G}_{12}\sigma_{12} \\ \mathbf{G}_{21}\sigma_{12} & \mathbf{G}_{22}\sigma_2^2 \end{bmatrix} \right). \quad (2)$$

124 where  $\mathbf{a}_1$  is the vector with additive genetic values for individuals from population 1 for trait  
 125 1,  $\mathbf{a}_2$  is the analogous vector for individuals from population 2 for trait 2,  $\sigma_1^2$  and  $\sigma_2^2$  are  
 126 genetic variances for the two traits,  $\sigma_{12}$  is the genetic covariance between the traits,  $\mathbf{G}_{11}$  is a  
 127 matrix with genomic relationships within population 1,  $\mathbf{G}_{22}$  is a matrix with genomic  
 128 relationships within population 2, and  $\mathbf{G}_{12}$  and  $\mathbf{G}_{21}(= \mathbf{G}_{12}')$  are matrices with genomic  
 129 relationships between population 1 and 2.

130 To derive the definition of the genomic relationships in Equation 2, we derive the  
 131 variances and covariance of the additive genetic values for the two traits. Naturally, this will  
 132 result in an equation to calculate the genomic relationship matrix ( $\mathbf{G}$ ) across populations to  
 133 estimate (co)variances in the current populations.

134 When both populations are in Hardy-Weinberg equilibrium, allele substitution effects are  
 135 independent from allele frequency, and effects of causal loci are independent from each other,  
 136 the genetic variance for trait 1 can be written as  $\sigma_1^2 = \sum 2p_{1j}(1-p_{1j})\sigma_{\alpha_1}^2$ , where  $p_{1j}$  is the  
 137 allele frequency at locus  $j$  in population 1 (Falconer and Mackay 1996). Hence, the variance  
 138 of  $\mathbf{a}_1$  is:

$$139 \quad \text{Var}(\mathbf{a}_1) = \text{Var}(\mathbf{Z}_1\boldsymbol{\alpha}_1) = \mathbf{Z}_1\mathbf{Z}_1'\sigma_{\alpha_1}^2 = \frac{\mathbf{Z}_1\mathbf{Z}_1'}{\sum 2p_{1j}(1-p_{1j})}\sigma_1^2, \quad (3)$$

140 where  $\mathbf{Z}_1$  is a  $n_I \times n_c$  matrix of centered genotypes for all individuals from population 1 ( $n_I$ )  
 141 for all causal loci, and  $\mathbf{a}_1$  is a vector of length  $n_c$  with allele substitution effects at causal loci  
 142 for trait 1.

143 Similarly,

$$144 \quad \text{Var}(\mathbf{a}_2) = \frac{\mathbf{Z}_2 \mathbf{Z}_2'}{\sum 2p_{2j}(1-p_{2j})} \sigma_2^2. \quad (4)$$

145 The genetic covariance between the two traits is:

$$146 \quad \sigma_{12} = r_g \sqrt{\sigma_1^2} \sqrt{\sigma_2^2} = r_g \sqrt{\sum 2p_{1j}(1-p_{1j})\sigma_{\alpha_1}^2} \sqrt{\sum 2p_{2j}(1-p_{2j})\sigma_{\alpha_2}^2} =$$

$$147 \quad = \sigma_{\alpha_{12}} \sqrt{\sum 2p_{1j}(1-p_{1j})} \sqrt{\sum 2p_{2j}(1-p_{2j})}. \quad (5)$$

148 Therefore, the covariance between genetic values of population 1 and 2 is:

$$149 \quad \text{Cov}(\mathbf{a}_1, \mathbf{a}_2) = \text{Cov}(\mathbf{Z}_1 \mathbf{a}_1, \mathbf{Z}_2 \mathbf{a}_2) = \mathbf{Z}_1 \mathbf{Z}_2' \sigma_{\alpha_{12}} = \frac{\mathbf{Z}_1 \mathbf{Z}_2'}{\sqrt{\sum 2p_{1j}(1-p_{1j})} \sqrt{\sum 2p_{2j}(1-p_{2j})}} \sigma_{12}. \quad (6)$$

150 From Equation 3, 4 and 6, it follows that the genomic relationship matrix ( $\mathbf{G}$ ) is:

$$151 \quad \mathbf{G} = \begin{bmatrix} \mathbf{G}_{11} & \mathbf{G}_{12} \\ \mathbf{G}_{21} & \mathbf{G}_{22} \end{bmatrix} = \begin{bmatrix} \frac{\mathbf{Z}_1 \mathbf{Z}_1'}{\sum 2p_{1j}(1-p_{1j})} & \frac{\mathbf{Z}_1 \mathbf{Z}_2'}{\sqrt{\sum 2p_{1j}(1-p_{1j})} \sqrt{\sum 2p_{2j}(1-p_{2j})}} \\ \frac{\mathbf{Z}_2 \mathbf{Z}_1'}{\sqrt{\sum 2p_{1j}(1-p_{1j})} \sqrt{\sum 2p_{2j}(1-p_{2j})}} & \frac{\mathbf{Z}_2 \mathbf{Z}_2'}{\sum 2p_{2j}(1-p_{2j})} \end{bmatrix} \quad (7)$$

153 When allele frequencies from the current population are used,  $\mathbf{G}$  from Equation 7 estimates  
 154 current genetic (co)variances. Lourenco *et al.* (2016) presented a comparable  $\mathbf{G}$  matrix for  
 155 combining purebred and crossbred animals. Note that the covariance of the genotypes  
 156 between the populations,  $\mathbf{Z}_2 \mathbf{Z}_1'$ , is divided by the standard deviations of the genotypes in each  
 157 population,  $\sqrt{\sum 2p_{1j}(1-p_{1j})}$  and  $\sqrt{\sum 2p_{2j}(1-p_{2j})}$ . Therefore, the relationships in this  $\mathbf{G}$   
 158 matrix are defined as correlations between the individuals.



159 By interpreting  $\sum 2p_{1j}(1-p_{1j})$ ,  $\sum 2p_{2j}(1-p_{2j})$  and  $\sqrt{\sum 2p_{1j}(1-p_{1j})}\sqrt{\sum 2p_{2j}(1-p_{2j})}$   
 160 as scaling factors (i.e.  $k_1$ ,  $k_2$ , and  $k_{12}$ ) of  $\mathbf{G}$ , the variance-covariance matrix in Equation 2  
 161 becomes:

$$162 \begin{bmatrix} \mathbf{G}_{11}\sigma_1^2 & \mathbf{G}_{12}\sigma_{12} \\ \mathbf{G}_{21}\sigma_{12} & \mathbf{G}_{22}\sigma_2^2 \end{bmatrix} = \begin{bmatrix} \mathbf{Z}_1\mathbf{Z}'_1 \frac{\sigma_1^2}{k_1} & \mathbf{Z}_1\mathbf{Z}'_2 \frac{\sigma_{12}}{k_{12}} \\ \mathbf{Z}_2\mathbf{Z}'_1 \frac{\sigma_{12}}{k_{12}} & \mathbf{Z}_2\mathbf{Z}'_2 \frac{\sigma_2^2}{k_2} \end{bmatrix}. \quad (8)$$

163 Equation 8 shows that the scaling factors of  $\mathbf{G}$  and the variance components are completely  
 164 confounded. Therefore, other scaling factors of  $\mathbf{G}$  can be used to estimate the genetic  
 165 correlation as:

$$166 \hat{r}_g = \frac{\frac{\hat{\sigma}_{12}}{k_{12}}}{\sqrt{\frac{\hat{\sigma}_1^2}{k_1}} \sqrt{\frac{\hat{\sigma}_2^2}{k_2}}} = \frac{\sqrt{k_1}\sqrt{k_2}}{k_{12}} \frac{\hat{\sigma}_{12}}{\sqrt{\hat{\sigma}_1^2}\sqrt{\hat{\sigma}_2^2}}. \quad (9)$$

167 Equation 9 shows that the genetic correlation is directly estimated from the variance  
 168 components when the scaling factors of  $\mathbf{G}$  fulfil the property  $k_{12} = \sqrt{k_1}\sqrt{k_2}$ . When

169  $k_{12} \neq \sqrt{k_1}\sqrt{k_2}$ , the correlation based on variance components should be multiplied by

170  $\left(\frac{\sqrt{k_1}\sqrt{k_2}}{k_{12}}\right)$  to correct the estimated genetic correlation. By changing the scaling factors, the

171 genetic variances change as well. When genetic variances of the current population are of  
 172 interest, the within-population blocks in  $\mathbf{G}$  should be scaled as in Equation 7 (Legarra 2016).

173 Equation 8 and 9 show that the genetic correlation is estimated when the scaling factors in  
 174  $\mathbf{G}$  are the same for all blocks. When all scaling factors are equal to 1, so effectively no scaling  
 175 factor is used, the (co)variances represent the (co)variances of the causal effects i.e.,  $\sigma_{\alpha_1}^2$ ,  $\sigma_{\alpha_2}^2$   
 176 , and  $\sigma_{\alpha_{12}}$ . A disadvantage of this scaling is that elements of  $\mathbf{G}$  can become very large, which

177 can result in very small variance components that may be flagged as too small in statistical

178 software. This might be prevented by either scaling up the phenotypic variance by multiplying  
179 all phenotypes by a constant, or by scaling down the elements in **G** by dividing all elements  
180 by the same constant. Both scaling approaches have no influence on the genetic correlation,  
181 but do affect the genetic (co)variances.

182

### 183 **Simulations**

184 Simulations were used to validate the results above. Two populations of 2500 individuals  
185 each with phenotypes for a trait influenced by the same 15 000 loci were simulated. Allele  
186 frequencies of the loci were sampled from a U-shape distribution, independently in both  
187 populations. Genotypes were allocated to individuals according to Hardy-Weinberg  
188 equilibrium, assuming that loci were segregating independently. Therefore, genetic  
189 correlations between populations were only affected by pleiotropy and not by linkage  
190 disequilibrium.

191 Allele substitution effects were sampled from a bi-variate normal distribution with means  
192 zero and variances 1, and a correlation of 0.5 between allele substitution effects in both  
193 populations. The allele substitution effects were multiplied with the corresponding genotypes  
194 to calculate additive genetic values for individuals, assuming additive gene action.

195 Environmental effects were sampled from a normal distribution with variance ( $\frac{1}{h^2} - 1$ ) times  
196 the genetic variance, where the genetic variance was calculated across all individuals in both  
197 populations. The heritability was set to 0.9, to ensure that there was sufficient power in the  
198 data to estimate the (co)variances. Phenotypes were the sum of additive genetic and  
199 environmental effects, and were standardized to an average of 0 and a standard deviation of  
200 100. Simulations were replicated 100 times.

201 Phenotypes were analyzed in a two-trait model, using four different **G** matrices; two **G**  
202 matrices derived above, and two commonly used **G** matrices for multiple populations (Chen

203 *et al.* 2013; Makgahlela *et al.* 2013). In all four methods, genotypes at causal loci were used to  
 204 calculate  $\mathbf{G}$ . The methods differed in scaling factors as well as in centering of genotypes,  
 205 being performed either within or across populations.

206 In the first three methods, the genotypes in  $\mathbf{Z}$  were centered within population as  
 207  $g_{ijm} - 2p_{jm}$ , where  $g_{ijm}$  is the allele count of individual  $i$  from population  $m$  at locus  $j$  and  $p_{jm}$   
 208 is the allele frequency at locus  $j$  in population  $m$ . The first method,  $\mathbf{G}_{\text{New}}$ , scaled  $\mathbf{G}$   
 209 following Equation 9:

$$210 \quad \mathbf{G}_{\text{New}} = \begin{bmatrix} \frac{\mathbf{Z}_1 \mathbf{Z}'_1}{\sum 2p_{1j}(1-p_{1j})} & \frac{\mathbf{Z}_1 \mathbf{Z}'_2}{\sqrt{\sum 2p_{1j}(1-p_{1j})} \sqrt{\sum 2p_{2j}(1-p_{2j})}} \\ \frac{\mathbf{Z}_2 \mathbf{Z}'_1}{\sqrt{\sum 2p_{1j}(1-p_{1j})} \sqrt{\sum 2p_{2j}(1-p_{2j})}} & \frac{\mathbf{Z}_2 \mathbf{Z}'_2}{\sum 2p_{2j}(1-p_{2j})} \end{bmatrix}.$$

211 In the second method,  $\mathbf{G}_{-1}$ , scaling factors were equal to 1:

$$212 \quad \mathbf{G}_{-1} = \begin{bmatrix} \mathbf{Z}_1 \mathbf{Z}'_1 & \mathbf{Z}_1 \mathbf{Z}'_2 \\ \mathbf{Z}_2 \mathbf{Z}'_1 & \mathbf{Z}_2 \mathbf{Z}'_2 \end{bmatrix}.$$

213 The third method,  $\mathbf{G}_{\text{Chen}}$ , calculated  $\mathbf{G}$  according to Chen *et al.* (2013):

$$214 \quad \mathbf{G}_{\text{Chen}} = \begin{bmatrix} \frac{\mathbf{Z}_1 \mathbf{Z}'_1}{\sum 2p_{1j}(1-p_{1j})} & \frac{\mathbf{Z}_1 \mathbf{Z}'_2}{\sum 2\sqrt{p_{1j}(1-p_{1j})p_{2j}(1-p_{2j})}} \\ \frac{\mathbf{Z}_2 \mathbf{Z}'_1}{\sum 2\sqrt{p_{1j}(1-p_{1j})p_{2j}(1-p_{2j})}} & \frac{\mathbf{Z}_2 \mathbf{Z}'_2}{\sum 2p_{2j}(1-p_{2j})} \end{bmatrix}.$$

215 The fourth method,  $\mathbf{G}_{\text{Across}}$ , used the average allele frequency across both populations  
 216 instead of population-specific allele frequencies to center the genotypes (e.g., Makgahlela *et*  
 217 *al.* 2013). Thus, the matrix of genotypes, denoted  $\mathbf{Z}^*$ , had elements  $g_{ijm} - 2\bar{p}_j$ , where  $\bar{p}_j$  is  
 218 the average allele frequency across both populations at locus  $j$ . The scaling factor was the  
 219 same for all blocks:

220 
$$\mathbf{G\_Across} = \begin{bmatrix} \frac{\mathbf{Z}_1^* \mathbf{Z}_1^{*'}}{\sum 2\bar{p}_j(1-\bar{p}_j)} & \frac{\mathbf{Z}_1^* \mathbf{Z}_2^{*'}}{\sum 2\bar{p}_j(1-\bar{p}_j)} \\ \frac{\mathbf{Z}_2^* \mathbf{Z}_1^{*'}}{\sum 2\bar{p}_j(1-\bar{p}_j)} & \frac{\mathbf{Z}_2^* \mathbf{Z}_2^{*'}}{\sum 2\bar{p}_j(1-\bar{p}_j)} \end{bmatrix}.$$

221  $\mathbf{G\_New}$ ,  $\mathbf{G\_1}$  and  $\mathbf{G\_Across}$  fulfilled the property  $k_{12} = \sqrt{k_1} \sqrt{k_2}$  to directly estimate the  
 222 genetic correlation. In  $\mathbf{G\_Chen}$ ,  $k_{12} \neq \sqrt{k_1} \sqrt{k_2}$  when allele frequencies in the two populations  
 223 were different. Therefore, the genetic correlation estimated with  $\mathbf{G\_Chen}$  was multiplied by

224 
$$\frac{\sqrt{k_1} \sqrt{k_2}}{k_{12}} = \frac{\sqrt{\sum 2p_{1j}(1-p_{1j})} \sqrt{\sum 2p_{2j}(1-p_{2j})}}{\sum 2\sqrt{p_{1j}(1-p_{1j})p_{2j}(1-p_{2j})}}$$
 to correct the estimate. Moreover, the current

225 populations were the base population for the within-population blocks of  $\mathbf{G\_New}$  and  
 226  $\mathbf{G\_Chen}$ , so those  $\mathbf{G}$  matrices estimated the genetic variances within the current populations  
 227 (Speed and Balding 2015; Legarra 2016). As explained before, the variances of  $\mathbf{G\_1}$   
 228 represented the variances of the causal effects. For  $\mathbf{G\_Across}$ , the base population was not  
 229 clearly defined, so the interpretation of the estimated genetic variances is unclear. See  
 230 supporting information for the R-script and seeds used to simulate genotypes and phenotypes  
 231 and to calculate the different  $\mathbf{G}$  matrices.

232

## RESULTS

### 233 Variance components

234 In Figure 1, the estimated genetic variance using  $\mathbf{G}_{\text{New}}$  is plotted against the simulated  
235 genetic variance. This figure shows that the estimates varied only slightly around the  
236 simulated values. This shows that  $\mathbf{G}_{\text{New}}$  unbiasedly estimated the genetic variance in the  
237 current populations.

238 As expected,  $\mathbf{G}_{\text{New}}$  and  $\mathbf{G}_{\text{Chen}}$  estimated the same genetic variances (Figure 2 and 3).  
239 The variances of  $\mathbf{G}_{\text{1}}$  represented the variances of the causal effects. By multiplying those  
240 variances by  $\sum 2p_{jm}(1-p_{jm})$  for population  $m$ , genetic variances identical to  $\mathbf{G}_{\text{New}}$  and  
241  $\mathbf{G}_{\text{Chen}}$  were obtained. The genetic variance estimated with  $\mathbf{G}_{\text{Across}}$  was approximately a  
242 factor 1.5 higher than the genetic variance estimated with  $\mathbf{G}_{\text{New}}$  and  $\mathbf{G}_{\text{Chen}}$ . Also the  
243 scaling factors  $k_1$  and  $k_2$  were approximately a factor 1.5 higher. Hence, when multiplying the  
244 variances estimated with  $\mathbf{G}_{\text{Across}}$  by the ratio in scaling factors, estimates became identical  
245 to those with  $\mathbf{G}_{\text{New}}$  and  $\mathbf{G}_{\text{Chen}}$ . So, the difference in estimated variances between  
246 methods was completely explained by the difference in scaling factors, while centering  
247 genotypes within or across populations had no effect on estimated variances. Estimated  
248 residual variances were exactly the same for the four different  $\mathbf{G}$  matrices.

249

### 250 Genetic correlation

251 Despite differences in (co)variance estimates,  $\mathbf{G}_{\text{New}}$ ,  $\mathbf{G}_{\text{1}}$ , and  $\mathbf{G}_{\text{Across}}$  yielded the  
252 same estimated genetic correlation (Figure 4) which was an unbiased estimate of the  
253 simulated genetic correlation (Figure 5). This is because differences in genetic covariances  
254 among models were compensated by corresponding differences in genetic variances. The

255 genetic correlation estimated using  $\mathbf{G}_{\text{Chen}}$  was ~20% lower. When multiplying this estimate

256 by  $\frac{\sqrt{k_1}\sqrt{k_2}}{k_{12}}=1.23$ , the genetic correlation became identical to the other three methods.

257

258

## DISCUSSION

259 The aim of this paper was to define a multi-population genomic relationship matrix to  
260 estimate current genetic variances within and genetic correlations between populations. We  
261 derived a genomic relationship matrix,  $\mathbf{G}_{\text{New}}$ , that yields unbiased estimates of current  
262 genetic variances, covariances and correlations. Moreover, we showed the required property  
263 for other genomic relationship matrices to estimate the genetic correlation between  
264 populations, even though estimated variance components are not necessarily related to the  
265 current populations.

266

### 267 **Methods to calculate the genomic relationship matrix**

268 From the four methods used in this paper to calculate  $\mathbf{G}$ ,  $\mathbf{G}_{\text{New}}$  was the only matrix  
269 correctly estimating both current genetic variances as well as genetic correlations.  $\mathbf{G}_{\text{Chen}}$   
270 also estimated current genetic variances, but the estimated genetic correlation had to be  
271 multiplied by  $\frac{\sqrt{k_1}\sqrt{k_2}}{k_{12}}$ .  $\mathbf{G}_1$  estimated the correct genetic correlation, but estimated the  
272 variance of causal effects instead of the genetic variance. Although the base population in  
273  $\mathbf{G}_{\text{Across}}$  was not well defined, genetic correlations were correctly estimated but there was  
274 no clear interpretation of the estimated genetic variances. Results also showed that genetic  
275 variances were not affected by centering the allele count, as shown before by Strandén and  
276 Christensen (2011).

277 Table 1 gives an overview of the most frequently used methods to calculate  $\mathbf{G}$  across  
278 multiple populations, with scaling factors and correction factors for the estimated genetic  
279 correlation.  $\mathbf{G}_{\text{New}}$ ,  $\mathbf{G}_1$ ,  $\mathbf{G}_{\text{Across}}$ , and the method described by Erbe *et al.* (2012) directly  
280 estimate the correct genetic correlation. The  $\mathbf{G}_{\text{Chen}}$  method does not directly estimate the  
281 genetic correlation, but the estimate can be corrected using the scaling factors. Those five

282 methods all assume that allele substitution effects are independent of allele frequency, similar  
283 to method 1 of VanRaden (2008). This is in contrast to another regularly used method, namely  
284 method 2 of VanRaden (2008), also described by Yang (2010). This method yields a valid  
285 relationship matrix only when the average effect at a locus is proportional to the reciprocal of  
286 the square root of expected heterozygosity at that locus (Appendix, Equation A8). So, this  
287 method assumes that marker effects are determined by their allele frequency, with larger  
288 effects for rarer alleles. For a trait determined by relatively few genes and undergoing  
289 directional selection, this assumption may be plausible, since selection acts stronger on causal  
290 loci with a larger effect (Haldane 1924; Wright 1931, 1937). It is, however, a very strong  
291 assumption in general. Many traits may experience only weak selection, and/or are  
292 determined by many genes. In those cases, allele frequency distribution is determined mainly  
293 by the interplay of mutation and drift, and a direct relationship between effect size and allele  
294 frequency is not expected. Therefore, the assumption of independence between allele  
295 frequency and allele substitution effects seems more realistic for most traits. Moreover, when  
296 allele substitution effects would depend on allele frequency, effects for exactly the same trait  
297 would differ between populations when allele frequencies differ. This makes the  
298 interpretation of a genetic correlation estimated using method 2 of VanRaden (2008) rather  
299 difficult. Therefore, we advise to use  $\mathbf{G}$  matrices based on method 1 instead of method 2 of  
300 VanRaden (2008), especially when multiple populations are considered.

301 In this paper, we assumed that causal loci were known and were used to calculate  $\mathbf{G}$ . In  
302 this way, differences in linkage disequilibrium (LD) between markers and causal loci across  
303 populations did not affect the results and all genetic variance was explained by  $\mathbf{G}$ . When  
304 genomic markers are used to calculate  $\mathbf{G}$ , differences in LD can affect the results, since the  
305 LD pattern is known to differ across populations in humans (Sawyer *et al.* 2005) as well as in  
306 livestock (e.g., Heifetz *et al.* 2005; Gautier *et al.* 2007; Veroneze *et al.* 2013). This difference



307 in LD is likely to affect the estimated genetic correlation, since it reduces the correlation of  
308 marker effects (Gianola *et al.* 2015). Moreover, markers might not explain all genetic  
309 variance when there is no complete LD between a causal locus and at least one marker (e.g.,  
310 Yang *et al.* 2010; Daetwyler *et al.* 2013). This can affect the estimated genetic correlation  
311 when the variance explained by the markers shows either a higher or lower genetic correlation  
312 than the part not explained (Bulik-Sullivan *et al.* 2015). Therefore, it is difficult to predict the  
313 effect of not explaining all genetic variance by markers on the estimated genetic correlation.  
314 In a follow-up study, we will investigate the effect of using marker genotypes on the  
315 estimated genetic correlation between populations.

316

### 317 **Other approaches to estimate the genetic correlation between populations**

318 We focused on using genomic relationships in a multi-trait model to estimate genetic  
319 correlations between populations. Genetic correlations can also be estimated using summary  
320 statistics of genome-wide association studies (GWAS; Bulik-Sullivan *et al.* 2015; Brown *et*  
321 *al.* 2016) or using random regression on genotypes (Sørensen *et al.* 2012; Krag *et al.* 2013).  
322 The method based on summary statistics of GWAS combines information from different  
323 studies and weights estimated marker effects by LD overlap and corresponding  $z$  score (Bulik-  
324 Sullivan *et al.* 2015; Brown *et al.* 2016). This method is beneficial when the costs of  
325 collecting enough data are high and data sharing is not possible. It is, however, not known  
326 whether this method estimates the correct genetic correlation. The method using random  
327 regression on genotypes is equivalent to the multi-trait GREML method used in this study,  
328 since both estimate the same additive genetic values when the genotypes are centered and  
329 scaled in the same way (Habier *et al.* 2007; VanRaden 2008; Goddard 2009). Variance  
330 components estimated with random regression on marker genotypes represent variances of  
331 marker effects (Meuwissen *et al.* 2001), similar to  $\mathbf{G}_1$ , when the same centered genotypes

332 are used as input. Hence, random regression on centered genotypes can also be used to  
333 estimate genetic correlations between populations. When genotypes for the random regression  
334 are centered and scaled, the estimated genetic correlation becomes equal to the estimated  
335 genetic correlation using  $\mathbf{G}$  based on method 2 of VanRaden (VanRaden 2008; Yang *et al.*  
336 2010). Therefore, the interpretation of this estimated genetic correlation remains unclear as  
337 well.

338

### 339 **Importance of the genetic correlation between populations**

340 The genetic correlation between populations is an important parameter for genomic  
341 prediction, since it determines the usefulness of combining information from multiple  
342 populations. A low genetic correlation means that it is very unlikely that combining  
343 populations will increase the accuracy of estimated genetic values. Therefore, the genetic  
344 correlation partly determines the accuracy of across- or multi-population genomic prediction.  
345 For predicting the accuracy in those scenarios, an accurate estimation of genetic correlations  
346 is essential (Wientjes *et al.* 2015; Wientjes *et al.* 2016). For predicting response to selection,  
347 both the accuracy as well as current genetic variances are needed (Falconer and Mackay  
348 1996). Even though the accuracy of estimated genetic values is quite consistent across  
349 methods for calculating  $\mathbf{G}$  (Makgahlela *et al.* 2013, 2014; Lourenco *et al.* 2016), for  
350 estimating genetic (co)variances and correlations it is important to use the  $\mathbf{G}_{\text{New}}$  matrix.

351

### 352 **Genetic correlation versus genic correlation**

353 The genetic correlation is defined based on additive genetic (co)variances. Under selection,  
354 however, additive genetic (co)variances change over generations, since selection creates  
355 transient gametic phase disequilibrium (i.e., correlations between allele substitution effects at  
356 different loci). This process is also known as the Bulmer effect (Bulmer 1971). Therefore,

357 genetic (co)variances and correlations depend not only on the genetic background of the traits,  
358 but also on transient processes like the type and intensity of selection. Apart from additive  
359 genetic (co)variances, quantitative genetics also describes genic (co)variances (e.g., Bulmer  
360 1980; Bulmer 1989), defined as the additive genetic (co)variance in the absence of gametic  
361 phase disequilibrium. In contrast to genetic variances, genic variances are independent from  
362 selection and are always equal to twice the Mendelian sampling variance (Hill 2014). In  
363 analogy to genic (co)variances, genic correlations can be defined as well. We believe that  
364 genic correlations are more relevant than additive genetic correlations, since genic  
365 correlations are not influenced by transient processes and, therefore, more constant across  
366 generations.

367 In our simulation study, allele substitution effects were randomly sampled, so no transient  
368 gametic phase disequilibrium was present and genic (co)variances were equal to the additive  
369 genetic (co)variances. In all situations, genic variances can be estimated when the base  
370 population of the relationship matrix is unselected and phenotypic records on which selection  
371 decisions are based are available (Henderson 1985). It is also shown that even when  
372 phenotypic records from the base population are absent, the genic variance can be estimated  
373 when phenotypic records for several generations are available and the base population is  
374 unselected (Henderson 1985; Van der Werf and de Boer 1990). It can be expected that as long  
375 as several generations of phenotypic data is available in combination with the relationships  
376 between all those individuals, variances are corrected for selection and effectively genic  
377 variances are estimated. Therefore, genic correlations can likely be calculated using  $\mathbf{G}_{New}$ ,  
378 provided that data is available for several generations.

379

## 380 **Conclusion**

381 The properties of the genomic relationship matrix affect estimates of genetic variances  
382 within as well as genetic correlations between populations. For estimating current genetic  
383 variances, allele frequencies of the current population should be used to calculate  
384 relationships within that population. For estimating genetic correlations between populations,  
385 scaling factors of the different blocks of the relationship matrix, based on method 1 of  
386 VanRaden (2008), should fulfill the property  $k_{12} = \sqrt{k_1} \sqrt{k_2}$ . When this property is not  
387 fulfilled, the estimated genetic correlation can be corrected by multiplying the estimate by  
388  $\frac{\sqrt{k_1} \sqrt{k_2}}{k_{12}}$ . In this study we present a genomic relationship matrix, **G**\_New, which directly  
389 results in current genetic variances as well as genetic correlations between populations.

390

391

392

393

## ACKNOWLEDGMENTS

394 This research is supported by the Netherlands Organisation of Scientific Research (NWO)

395 and the Breed4Food consortium partners Cobb Europe, CRV, Hendrix Genetics and

396 Topigs Norsvin.

397

398

399  
400  
401  
402  
403  
404  
405  
406  
407  
408  
409  
410  
411  
412  
413  
414  
415  
416  
417  
418  
419  
420  
421  
422  
423

## LITERATURE CITED

- Bohren, B. B., W. G. Hill and A. Robertson, 1966 Some observations on asymmetrical correlated responses to selection. *Genet. Res.* 7: 44-57.
- Brown, B. C., C. J. Ye, A. L. Price and N. Zaitlen, 2016 Transethnic genetic-correlation estimates from summary statistics. *Am. J. Hum. Genet.* 99: 76-88.
- Bulik-Sullivan, B., H. K. Finucane, V. Anttila, A. Gusev, F. R. Day, *et al.*, 2015 An atlas of genetic correlations across human diseases and traits. *Nat. Genet.* 47: 1236-1241.
- Bulmer, M., 1989 Maintenance of genetic variability by mutation-selection balance: a child's guide through the jungle. *Genome* 31: 761-767.
- Bulmer, M. G., 1971 The effect of selection on genetic variability. *Am. Nat.* 105: 201-211.
- Bulmer, M. G., 1980 *The mathematical theory of quantitative genetics*. Clarendon Press., Oxford.
- Chen, L., F. Schenkel, M. Vinsky, D. Crews and C. Li, 2013 Accuracy of predicting genomic breeding values for residual feed intake in Angus and Charolais beef cattle. *J. Anim. Sci.* 91: 4669-4678.
- Daetwyler, H. D., M. P. L. Calus, R. Pong-Wong, G. De los Campos and J. M. Hickey, 2013 Genomic prediction in animals and plants: Simulation of data, validation, reporting, and benchmarking. *Genetics* 193: 347-365.
- De Candia, T. R., S. H. Lee, J. Yang, B. L. Browning, P. V. Gejman, *et al.*, 2013 Additive genetic variation in schizophrenia risk is shared by populations of African and European descent. *Am. J. Hum. Genet.* 93: 463-470.
- Erbe, M., B. J. Hayes, L. K. Matukumalli, S. Goswami, P. J. Bowman, *et al.*, 2012 Improving accuracy of genomic predictions within and between dairy cattle breeds with imputed high-density single nucleotide polymorphism panels. *J. Dairy Sci.* 95: 4114-4129.

- 424 Falconer, D. S., 1952 The problem of environment and selection. *Amer. Nat.* 86: 293-298.
- 425 Falconer, D. S. and T. F. C. Mackay, 1996 *Introduction to quantitative genetics*. Pearson  
426 Education Limited, Harlow.
- 427 Fisher, R. A., 1918 The Correlation between relatives on the supposition of Mendelian  
428 inheritance. *Trans. Roy. Soc. Edinburgh* 52: 399-433.
- 429 Fisher, R. A., 1930 *The genetical theory of natural selection: a complete variorum edition*.  
430 Oxford University Press.
- 431 Gautier, M., T. Faraut, K. Moazami-Goudarzi, V. Navratil, M. Foglio, *et al.*, 2007 Genetic  
432 and haplotypic structure in 14 European and African cattle breeds. *Genetics* 177: 1059-  
433 1070.
- 434 Gianola, D., G. De los Campos, M. A. Toro, H. Naya, C.-C. Schön, *et al.*, 2015 Do molecular  
435 markers inform about pleiotropy? *Genetics* 201: 23-29.
- 436 Goddard, M. E., 2009 Genomic selection: Prediction of accuracy and maximisation of long  
437 term response. *Genetica* 136: 245-257.
- 438 Habier, D., R. L. Fernando and J. C. M. Dekkers, 2007 The impact of genetic relationship  
439 information on genome-assisted breeding values. *Genetics* 177: 2389-2397.
- 440 Haldane, J. B. S., 1924 A mathematical theory of natural and artificial selection—I. *Trans.*  
441 *Camb. Phil. Soc.* 23: 19-41.
- 442 Harris, B. L. and D. L. Johnson, 2010 Genomic predictions for New Zealand dairy bulls and  
443 integration with national genetic evaluation. *J. Dairy Sci.* 93: 1243-1252.
- 444 Hayes, B. J., P. M. Visscher and M. E. Goddard, 2009 Increased accuracy of artificial  
445 selection by using the realized relationship matrix. *Genet. Res.* 91: 47-60.
- 446 Heifetz, E. M., J. E. Fulton, N. O'Sullivan, H. Zhao, J. C. M. Dekkers, *et al.*, 2005 Extent and  
447 consistency across generations of linkage disequilibrium in commercial layer chicken  
448 breeding populations. *Genetics* 171: 1173-1181.

- 449 Henderson, C. R., 1985 Best linear unbiased prediction using relationship matrices derived  
450 from selected base populations. *J. Dairy Sci.* 68: 443-448.
- 451 Hill, W. G., 2014 Applications of population genetics to animal breeding, from Wright, Fisher  
452 and Lush to genomic prediction. *Genetics* 196: 1-16.
- 453 Karoui, S., M. Carabaño, C. Díaz and A. Legarra, 2012 Joint genomic evaluation of French  
454 dairy cattle breeds using multiple-trait models. *Genet. Sel. Evol.* 44: 39.
- 455 Krag, K., N. A. Poulsen, M. K. Larsen, L. B. Larsen, L. L. Janss, *et al.*, 2013 Genetic  
456 parameters for milk fatty acids in Danish Holstein cattle based on SNP markers using a  
457 Bayesian approach. *BMC Genet.* 14: 79.
- 458 Legarra, A., 2016 Comparing estimates of genetic variance across different relationship  
459 models. *Theor. Popul. Biol.* 107: 26-30.
- 460 Lehermeier, C., C.-C. Schön and G. De los Campos, 2015 Assessment of genetic  
461 heterogeneity in structured plant populations using multivariate whole-genome regression  
462 models. *Genetics* 201: 323-337.
- 463 Lourenco, D. A. L., S. Tsuruta, B. O. Fragomeni, C. Y. Chen, W. O. Herring, *et al.*, 2016  
464 Crossbreed evaluations in single-step genomic best linear unbiased predictor using  
465 adjusted realized relationship matrices. *J. Anim. Sci.* 94: 909-919.
- 466 Makgahlela, M. L., I. Strandén, U. S. Nielsen, M. J. Sillanpää and E. A. Mäntysaari, 2013 The  
467 estimation of genomic relationships using breedwise allele frequencies among animals in  
468 multibreed populations. *J. Dairy Sci.* 96: 5364-5375.
- 469 Makgahlela, M. L., I. Strandén, U. S. Nielsen, M. J. Sillanpää and E. A. Mäntysaari, 2014  
470 Using the unified relationship matrix adjusted by breed-wise allele frequencies in genomic  
471 evaluation of a multibreed population. *J. Dairy Sci.* 97: 1117-1127.
- 472 Meuwissen, T. H. E., B. J. Hayes and M. E. Goddard, 2001 Prediction of total genetic value  
473 using genome-wide dense marker maps. *Genetics* 157: 1819-1829.



- 474 Olson, K. M., P. M. VanRaden and M. E. Tooker, 2012 Multibreed genomic evaluations  
475 using purebred Holsteins, Jerseys, and Brown Swiss. *J. Dairy Sci.* 95: 5378-5383.
- 476 Powell, J. E., P. M. Visscher and M. E. Goddard, 2010 Reconciling the analysis of IBD and  
477 IBS in complex trait studies. *Nat. Rev. Gen.* 11: 800-805.
- 478 Sawyer, S. L., N. Mukherjee, A. J. Pakstis, L. Feuk, J. R. Kidd, *et al.*, 2005 Linkage  
479 disequilibrium patterns vary substantially among populations. *Europ. J. Hum. Genet.* 13:  
480 677-686.
- 481 Sørensen, L. P., L. Janss, P. Madsen, T. Mark and M. S. Lund, 2012 Estimation of  
482 (co)variances for genomic regions of flexible sizes: application to complex infectious  
483 udder diseases in dairy cattle. *Genet. Sel. Evol.* 44: 18.
- 484 Speed, D. and D. J. Balding, 2015 Relatedness in the post-genomic era: is it still useful? *Nat.*  
485 *Rev. Genet.* 16: 33-44.
- 486 Strandén, I. and O. F. Christensen, 2011 Allele coding in genomic evaluation. *Genet. Sel.*  
487 *Evol.* 43: 25.
- 488 Van der Werf, J. and I. de Boer, 1990 Estimation of additive genetic variance when base  
489 populations are selected. *J. Anim. Sci.* 68: 3124-3132.
- 490 VanRaden, P. M., 2008 Efficient methods to compute genomic predictions. *J. Dairy Sci.* 91:  
491 4414-4423.
- 492 Veroneze, R., P. S. Lopes, S. E. F. Guimarães, F. F. Silva, M. S. Lopes, *et al.*, 2013 Linkage  
493 disequilibrium and haplotype block structure in six commercial pig lines. *J. Anim. Sci.* 91:  
494 3493-3501.
- 495 Visscher, P. M., G. Hemani, A. A. E. Vinkhuyzen, G.-B. Chen, S. H. Lee, *et al.*, 2014  
496 Statistical power to detect genetic (co)variance of complex traits using SNP data in  
497 unrelated samples. *PLoS Genet* 10: e1004269.

- 498 Wientjes, Y. C. J., R. F. Veerkamp, P. Bijma, H. Bovenhuis, C. Schrooten, *et al.*, 2015  
499 Empirical and deterministic accuracies of across-population genomic prediction. *Genet.*  
500 *Sel. Evol.* 47: 5.
- 501 Wientjes, Y. C. J., P. Bijma, R. F. Veerkamp and M. P. L. Calus, 2016 An equation to predict  
502 the accuracy of genomic values by combining data from multiple traits, breeds, lines, or  
503 environments. *Genetics* 202: 799-823.
- 504 Wright, S., 1931 Evolution in Mendelian populations. *Genetics* 16: 97-159.
- 505 Wright, S., 1937 The distribution of gene frequencies in populations. *Proc. Nat. Acad. Sci.*  
506 *USA* 23: 307-320.
- 507 Yang, J., B. Benyamin, B. P. McEvoy, S. Gordon, A. K. Henders, *et al.*, 2010 Common SNPs  
508 explain a large proportion of the heritability for human height. *Nat. Genet.* 42: 565-569.
- 509 Yang, J., A. Bakshi, Z. Zhu, G. Hemani, A. A. E. Vinkhuyzen, *et al.*, 2015 Genetic variance  
510 estimation with imputed variants finds negligible missing heritability for human height and  
511 body mass index. *Nat. Genet.* 47: 1114-1120.
- 512

513

## FIGURES

514

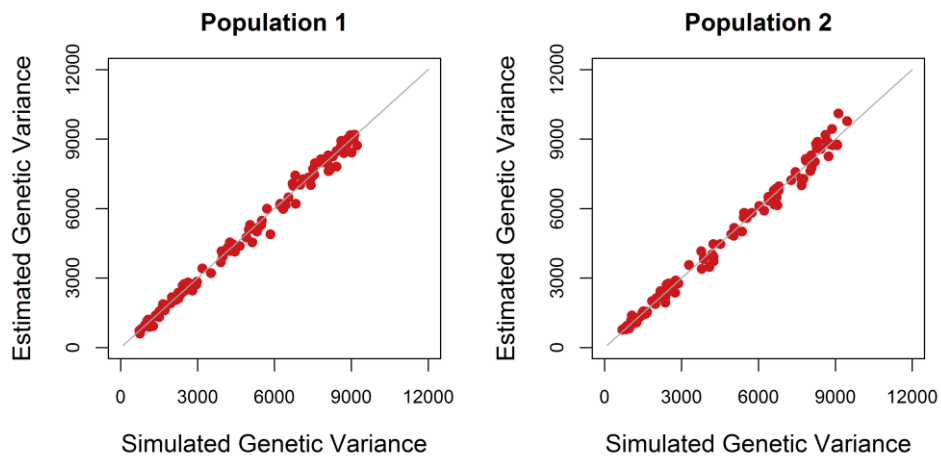

515

516 **Figure 1 – Estimated versus simulated genetic variance.** The estimated genetic variance in  
517 both populations in each of the 100 replicates using the genomic relationship matrix derived  
518 in this study ( $G_{New}$ ) versus the simulated genetic variance. The grey line represents the line  
519  $y=x$ .

520

521

522

## Genetic variance - Population 1

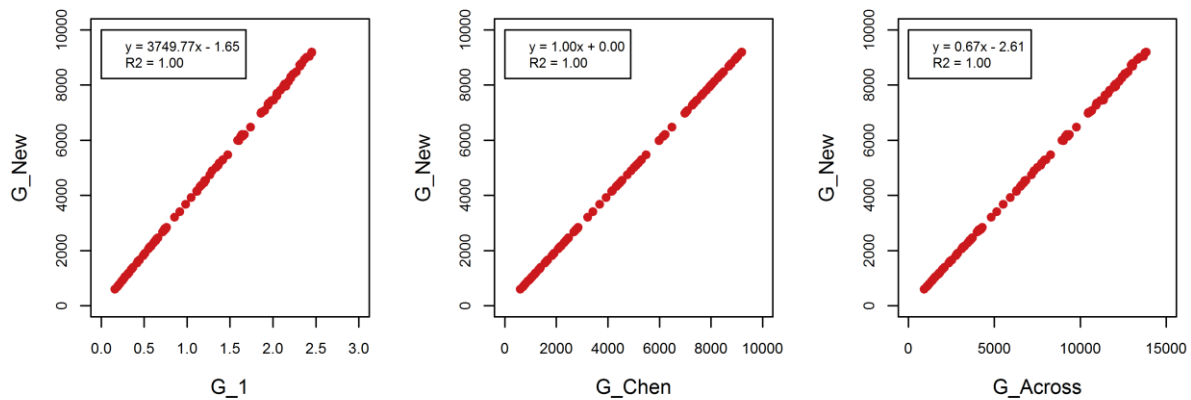

523

524 **Figure 2 – Estimated genetic variance in population 1.** The estimated genetic variance in  
525 population 1 in each of the 100 replicates using the genomic relationship matrix derived in  
526 this study ( $G_{New}$ ) versus the estimated genetic variance using population-specific allele  
527 frequencies and either a genomic relationship matrix without scaling factors ( $G_1$ ) or based  
528 on the method of Chen *et al.* (2013;  $G_{Chen}$ ), or using allele frequencies across populations  
529 ( $G_{Across}$ ).

530

531

## Genetic variance - Population 2

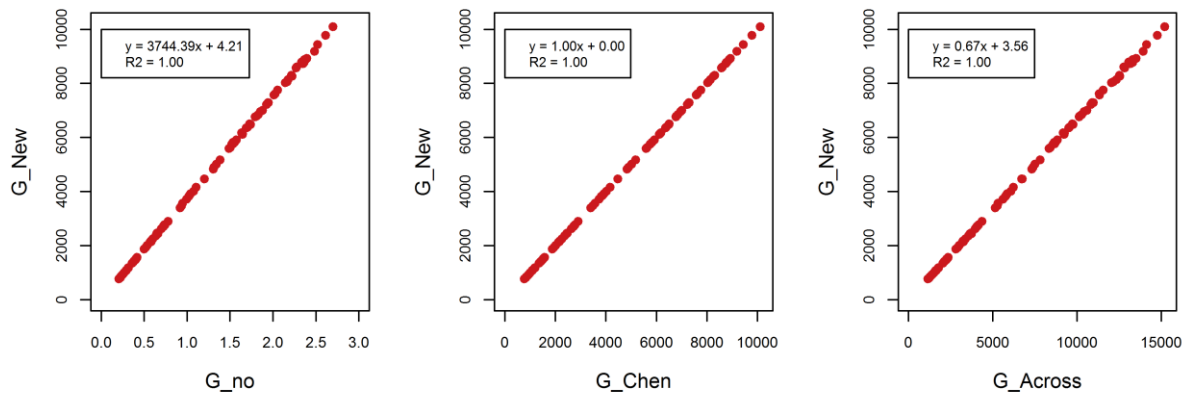

532

533 **Figure 3 – Estimated genetic variance in population 2.** The estimated genetic variance in

534 population 2 in each of the 100 replicates using the genomic relationship matrix derived in

535 this study ( $G_{New}$ ) versus the estimated genetic variance using population-specific allele

536 frequencies and either a genomic relationship matrix without scaling factors ( $G_1$ ) or based

537 on the method of Chen *et al.* (2013;  $G_{Chen}$ ), or using allele frequencies across populations

538 ( $G_{Across}$ ).

539

540

541

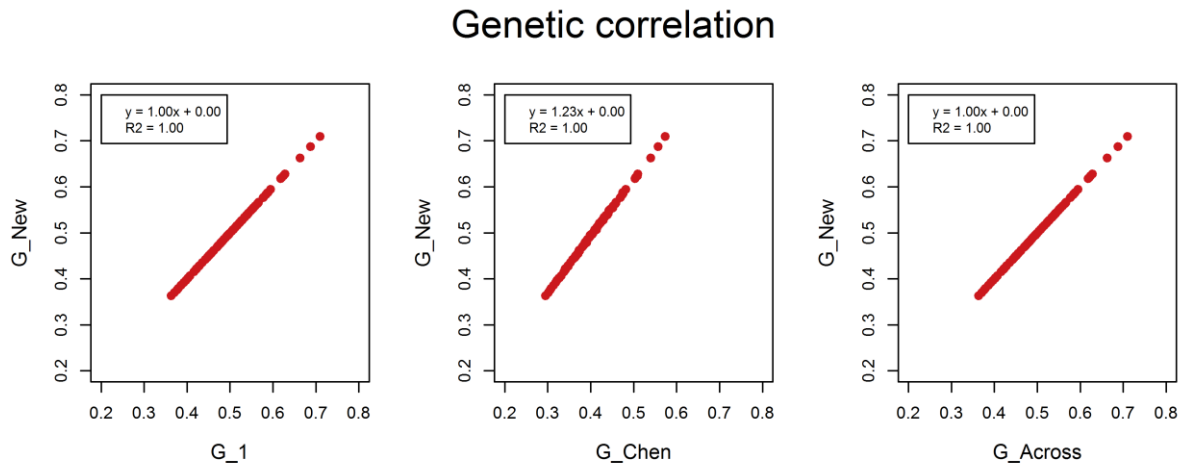

542  
543 **Figure 4 – Estimated genetic correlation between population 1 and 2.** The estimated  
544 genetic correlation between population 1 and 2 in each of the 100 replicates using the  
545 genomic relationship derived in this study (**G\_New**) versus the estimated genetic correlation  
546 using population-specific allele frequencies and either a genomic relationship matrix without  
547 scaling factors (**G\_1**), based on the method of Chen *et al.* (2013; **G\_Chén**), or using allele  
548 frequencies across populations (**G\_Across**).

549

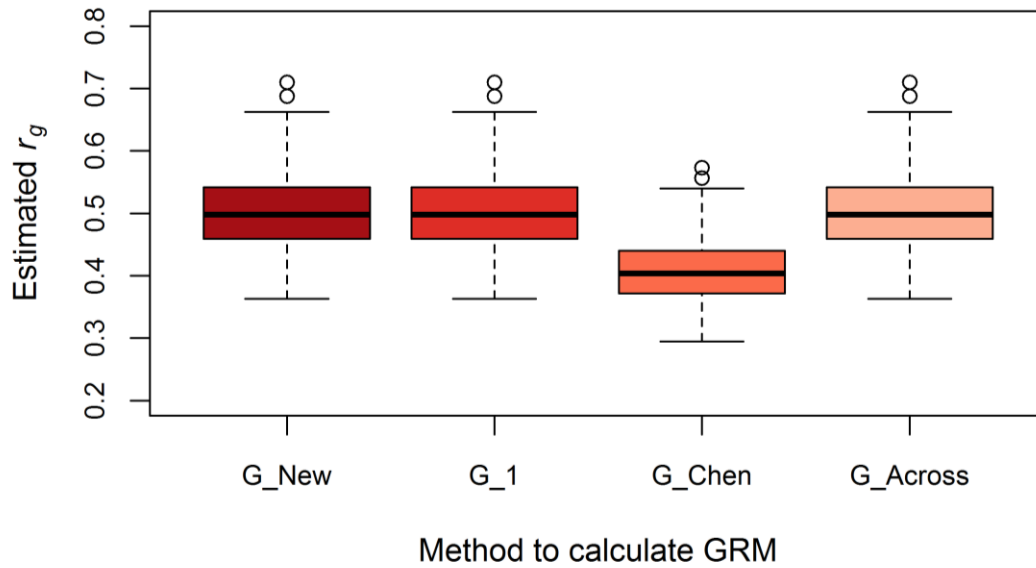

550

551 **Figure 5 – Boxplot of the estimated genetic correlation using different methods to**  
552 **calculate the genomic relationship matrix.** The estimated genetic correlation between  
553 population 1 and 2 in each of the 100 replicates using the genomic relationship matrix derived  
554 in this study (**G\_New**), using population-specific allele frequencies and either a genomic  
555 relationship matrix without scaling factors (**G\_1**), or based on the method of Chen *et al.*  
556 (2013; **G\_Chén**), or using allele frequencies across populations (**G\_Across**). The simulated  
557 genetic correlation was 0.5.

558 **Table 1** – Overview of frequently used method to calculate **G** across populations with scaling and correction factors.

| Method of calculating <b>G</b> <sup>a</sup> | Described by                                           | Used scaling factors of the different blocks in <b>G</b> <sup>b</sup> |                                |                                                              | Correction factor to correct the genetic correlation                                                               |
|---------------------------------------------|--------------------------------------------------------|-----------------------------------------------------------------------|--------------------------------|--------------------------------------------------------------|--------------------------------------------------------------------------------------------------------------------|
|                                             |                                                        | $k_1^c$                                                               | $k_2^c$                        | $k_{12}^c$                                                   |                                                                                                                    |
| <b>G_New</b>                                | This study                                             | $\sum 2p_{1i}(1-p_{1i})$                                              | $\sum 2p_{2i}(1-p_{2i})$       | $\sqrt{\sum 2p_{1i}(1-p_{1i})}\sqrt{\sum 2p_{2i}(1-p_{2i})}$ | Not needed                                                                                                         |
| <b>G_1</b>                                  | This study                                             | 1                                                                     | 1                              | 1                                                            | Not needed                                                                                                         |
| <b>G_Chen</b>                               | Chen <i>et al.</i> (2013)                              | $\sum 2p_{1i}(1-p_{1i})$                                              | $\sum 2p_{2i}(1-p_{2i})$       | $\sum 2\sqrt{p_{1i}(1-p_{1i})p_{2i}(1-p_{2i})}$              | $\frac{\sqrt{\sum 2p_{1i}(1-p_{1i})}\sqrt{\sum 2p_{2i}(1-p_{2i})}}{\sum 2\sqrt{p_{1i}(1-p_{1i})p_{2i}(1-p_{2i})}}$ |
| <b>G_Across</b>                             | VanRaden (2008)/<br>Makgahlela <i>et al.</i><br>(2013) | $\sum 2\bar{p}_i(1-\bar{p}_i)$                                        | $\sum 2\bar{p}_i(1-\bar{p}_i)$ | $\sum 2\bar{p}_i(1-\bar{p}_i)$                               | Not needed                                                                                                         |
| <b>Erbe</b>                                 | Erbe <i>et al.</i> (2012)                              | $\sum 2p_i^*(1-p_i^*)$                                                | $\sum 2p_i^*(1-p_i^*)$         | $\sum 2p_i^*(1-p_i^*)$                                       | Not needed                                                                                                         |
| <b>VanRaden2/<br/>Yang</b>                  | VanRaden (2008);<br>Yang <i>et al.</i> (2010)          | Nr. of markers <sup>d</sup>                                           | Nr. of markers <sup>d</sup>    | Nr. of markers <sup>d</sup>                                  | Unknown                                                                                                            |

559 <sup>a</sup> Methods were compared assuming that no adjustment for inbreeding or regression back to the pedigree relationship matrix was performed.

560 <sup>b</sup>  $k_1$  is the scaling factor of the block containing relationships in population 1,  $k_2$  is the scaling factor of the block containing relationships in  
561 population 2, and  $k_{12}$  is the scaling factor of the block containing relationship between population 1 and 2.

562 <sup>c</sup>  $p_{1i}$  is the allele frequency in population 1,  $p_{2i}$  is the allele frequency in population 2,  $\bar{p}_i$  is the average allele frequency across populations,  $p_i^*$   
563 is the estimated allele frequency when the populations separated.



564 <sup>d</sup> Per marker  $i$ , genotypes are scaled by  $\sqrt{2p_i(1-p_i)}$ .

565

566

567

## APPENDIX

568 The  $\mathbf{G}$  matrix based on method 2 of VanRaden (2008) and Yang *et al.* (2010),  $\mathbf{G}_{\text{VR2}}$ ,  
 569 weights markers by the reciprocal of the square root of the variance of its genotypes. In this  
 570 Appendix, it is shown that this is only correct under the assumption that the variance of the  
 571 average effect ( $\alpha$ ) at a locus, say  $l$ , is inversely proportional to expected heterozygosity at that  
 572 locus,

$$573 \quad \sigma_{\alpha_l}^2 = \frac{c}{2p_l(1-p_l)}, \quad (\text{A1})$$

574 where  $c$  is a constant, and  $p_l$  the allele frequency at locus  $l$ .

575 Consider the single-trait mixed model  $\mathbf{y} = \mathbf{Xb} + \mathbf{Za} + \mathbf{e}$ , where  $\mathbf{a}$  is the vector of random  
 576 additive genetic effects, with  $\text{var}(\mathbf{a}) = \mathbf{G}\sigma_A^2$ . This mixed model is valid only when  $\mathbf{G}\sigma_A^2$   
 577 indeed represents the covariances between additive genetic effects ( $A$ ) of individuals. This  
 578 requires that

$$579 \quad \mathbf{G}_{ij} = \text{cov}(A_i, A_j) / \text{var}(A), \quad (\text{A2})$$

580 where  $i$  and  $j$  are individuals.

581 By definition, the additive genetic effect of an individual is the sum of the average effects  
 582 at its loci, weighted by the centred allele count (Fisher 1918; Falconer and Mackay 1996),

$$583 \quad A_i = \sum_l (x_{il} - 2p_l)\alpha_l, \quad (\text{A3})$$

584 where  $x_{il}$  is the allele count of individual  $i$  at locus  $l$ , taking values 0, 1 or 2. Thus

$$585 \quad \text{cov}(A_i, A_j) = \text{cov} \left[ \sum_l (x_{il} - 2p_l)\alpha_l, \sum_l (x_{jl} - 2p_l)\alpha_l \right]. \quad (\text{A4})$$

586 For the genic covariance, the  $(x_{il} - 2p_l)\alpha_l$  terms are independent between loci by  
 587 definition (Bulmer 1971), so that the covariance reduces to

$$588 \quad \text{cov}(A_i, A_j) = \sum_l (x_{il} - 2p_l)(x_{jl} - 2p_l)\sigma_{\alpha_l}^2. \quad (\text{A5})$$

589 Substituting the relationship between average effects and allele frequency given by  
590 Equation A1 yields

$$591 \quad \text{cov}(A_i, A_j) = c \sum_l \left[ \frac{(x_{il} - 2p_l)(x_{jl} - 2p_l)}{2p_l(1-p_l)} \right]. \quad (\text{A6})$$

592 Analogously, the genic variance equals

$$593 \quad \text{var}(A) = \sum_l 2p_l(1-p_l)\sigma_{\alpha_l}^2 = \sum_l c = n_l c,$$

594 where  $n_l$  is the number of loci. Finally, from Equation A2,

$$595 \quad \mathbf{G}_{ij} = \text{cov}(A_i, A_j) / \text{var}(A) = \frac{1}{n_l} \sum_l \left[ \frac{(x_{il} - 2p_l)(x_{jl} - 2p_l)}{2p_l(1-p_l)} \right], \quad (\text{A7})$$

596 which is  $\mathbf{G\_VR2}$ . Thus obtaining  $\mathbf{G\_VR2}$  requires Equation A1.

597 Hence,  $\mathbf{G\_VR2}$  is valid under the assumption that the magnitude of the average effect at a  
598 locus is proportional to the reciprocal of the square root of expected heterozygosity at that  
599 locus,

$$600 \quad \alpha_l \propto \frac{1}{\sqrt{2p_l(1-p_l)}}. \quad (\text{A8})$$

601 Equation A7 shows that elements of  $\mathbf{G\_VR2}$  are the genome-wide average of the  
602 correlations at individual loci; the term in square-brackets is the correlation between additive  
603 genetic effects at locus  $l$ , and the sum of these terms is divided by the number of loci. Thus  
604  $\mathbf{G\_VR2}$  may have been motivated as the genome-wide average of relationships at individual  
605 loci.

606 However, relatedness refers to the correlation between the total additive genetic effects of  
607 individuals (Equation A2), which are sums of additive genetic effects at individual loci. In  
608 general, the correlation between sums does not equal the average correlation between  
609 components of the sums,

610 
$$\mathbf{G}_{ij} \neq \frac{1}{n_l} \sum_l \mathbf{G}_{ijl} \quad (\text{A9})$$

611 but is defined as the ratio of the covariance and variance of the sum,

612 
$$\mathbf{G}_{ij} = \text{cov}(A_i, A_j) / \sigma_A^2. \quad (\text{A10})$$

613 Equations A9 and A10 are only equal to each other under the assumption given in Equation

614 A1.

615

616

617
